# Supplementary material
Source: PubMed Central journal article supplement (PMC3672349)
Supplement: NIHMS443595-supplement-01.pdf [file NIHMS443595-supplement-01.pdf]

## **Supplementary Material for Ponicsan, et. al.**

### Contains:

Supplementary Table 1. Pol II peptides crosslinked to B2 RNA(81-130).

Supplementary Table 2. Pol II peptides crosslinked to B2 RNA(81-115).

Supplementary Figure 1. Nine peptides in crosslinked sample 1 are significantly enriched compared to the control samples.

Supplementary Figure 2. Nine peptides in crosslinked sample 2 are significantly enriched compared to the control samples.

Supplementary Figure 3. Plot depicting trypsin missed cleavage in peptides crosslinked to B2 RNA(81-130).

**Supplementary Table 1. Pol II peptides crosslinked to B2 RNA(81-130)**

| Peptide <sup>1</sup> | Sequence                    | Amino acid start-end | Missed cleavages | Modifications <sup>2</sup> | Charge | M/Z calculated | M/Z Error, ppm <sup>3</sup> | Elution time from HPLC (min) | Mascot score sample 1 <sup>4</sup> | Mascot score sample 2 <sup>4</sup> | Crosslink intensity sample 1 <sup>5</sup> | Crosslink intensity sample 2 <sup>5</sup> | Average purified Pol II intensity <sup>6</sup> |
|----------------------|-----------------------------|----------------------|------------------|----------------------------|--------|----------------|-----------------------------|------------------------------|------------------------------------|------------------------------------|-------------------------------------------|-------------------------------------------|------------------------------------------------|
| RPB1-1a              | K.RVQFGVLSPELKR.M           | 20-33                | 2                |                            | 2      | 744.4136       |                             | 64.031                       | *                                  | *                                  | 4.61x10 <sup>5</sup>                      | 2.49x10 <sup>5</sup>                      | 1.73x10 <sup>8</sup>                           |
| RPB1-1b              | K.RVQFGVLSPELKR.M           | 20-33                | 2                |                            | 3      | 548.6458       | 1.5183                      | 61.133                       | 48                                 | *                                  | 7.41x10 <sup>5</sup>                      | 2.96x10 <sup>5</sup>                      | 3.95x10 <sup>7</sup>                           |
| RPB1-2               | K.RMSVTEGGIK.Y              | 33-42                | 1                |                            | 2      | 539.2897       | 0.2944                      | 34.466                       | *                                  | 22                                 | 4.47x10 <sup>5</sup>                      | 3.87x10 <sup>5</sup>                      | 1.10x10 <sup>5</sup>                           |
| RPB1-3a              | K.RMSVTEGGIKYPETTEGGRPK.L   | 33-53                | 2                |                            | 4      | 574.0456       | 0.2008                      | 42.347                       | 23                                 | *                                  | 1.70x10 <sup>5</sup>                      | 4.42x10 <sup>4</sup>                      | 4.32x10 <sup>6</sup>                           |
| RPB1-3b              | K.RMSVTEGGIKYPETTEGGRPK.L   | 33-53                | 2                | O (M)                      | 4      | 578.0443       |                             |                              |                                    |                                    | NP                                        | NP                                        | 1.25x10 <sup>6</sup>                           |
| RPB1-4a              | K.FGVEQPEGDEDLTKEK.G        | 164-179              | 1                |                            | 2      | 910.9340       |                             | 47.539                       | *                                  | *                                  | 2.15x10 <sup>4</sup>                      | 2.62x10 <sup>4</sup>                      | 2.71x10 <sup>7</sup>                           |
| RPB1-4b              | K.FGVEQPEGDEDLTKEK.G        | 164-179              | 1                |                            | 3      | 607.6232       | 1.8589                      | 47.208                       | 26                                 | 23                                 | 2.94x10 <sup>5</sup>                      | 3.72x10 <sup>5</sup>                      | 1.29x10 <sup>6</sup>                           |
| RPB1-5               | K.KILLSPER.V                | 213-220              | 1                |                            | 2      | 478.3004       | 3.0263                      | 39.658                       | 25                                 | 26                                 | 1.03x10 <sup>6</sup>                      | 7.87x10 <sup>5</sup>                      | 2.77x10 <sup>6</sup>                           |
| RPB1-6               | R.RNEQNGAAAHVIAEDVK.L       | 292-308              | 1                | D (NQ)                     | 3      | 608.3063       | 5.8652                      | 41.202                       | 31                                 | 28                                 | 1.23x10 <sup>5</sup>                      | 5.19x10 <sup>4</sup>                      | 3.61x10 <sup>5</sup>                           |
| RPB1-7a              | R.AEIQLAMVPR.M              | 513-523              | 0                |                            | 2      | 628.8374       |                             |                              |                                    |                                    | NP                                        | NP                                        | 2.45x10 <sup>8</sup>                           |
| RPB1-7b              | R.AEIQLAMVPR.M              | 513-523              | 0                | O (M)                      | 2      | 636.8345       | 2.8359                      | 59.685                       | 44                                 | 59                                 | 9.00x10 <sup>5</sup>                      | 1.57x10 <sup>6</sup>                      | 5.31x10 <sup>7</sup>                           |
| RPB1-8               | K.KSLGTSAGSLVH.I            | 643-654              | 1                |                            | 2      | 578.8197       | 1.3424                      | 38.700                       | 26                                 | *                                  | 1.91x10 <sup>5</sup>                      | 3.90x10 <sup>5</sup>                      | NP                                             |
| RPB1-9               | H.TIGGDSIADSK.T             | 686-697              | 0                |                            | 2      | 588.8090       | 0.7821                      | 51.669                       | *                                  | 25                                 | 3.38x10 <sup>5</sup>                      | 3.30x10 <sup>5</sup>                      | 8.31x10 <sup>7</sup>                           |
| RPB1-10              | R.QTFENQVNR.I               | 735-743              | 0                |                            | 2      | 568.2782       | 0.9375                      | 31.297                       | *                                  | 36                                 | 3.08x10 <sup>5</sup>                      | 3.67x10 <sup>5</sup>                      | 5.46x10 <sup>6</sup>                           |
| RPB1-11              | K.SLSEYNFK.S                | 759-767              | 0                |                            | 2      | 551.2642       | 1.5133                      | 46.116                       | *                                  | 23                                 | 1.31x10 <sup>6</sup>                      | 8.60x10 <sup>5</sup>                      | 1.09x10 <sup>7</sup>                           |
| RPB1-12a             | R.TLPHFIKDDYGPESR.G         | 806-820              | 1                |                            | 2      | 887.9416       | 1.1684                      | 53.894                       | 31                                 | 31                                 | 3.61x10 <sup>5</sup>                      | 8.09x10 <sup>4</sup>                      | 1.43x10 <sup>8</sup>                           |
| RPB1-12b             | R.TLPHFIKDDYGPESR.G         | 806-820              | 1                |                            | 3      | 592.2968       | 2.0027                      | 53.887                       | 28                                 | *                                  | 4.83x10 <sup>6</sup>                      | 1.53x10 <sup>6</sup>                      | 1.10x10 <sup>7</sup>                           |
| RPB1-13              | K.TAETGYIQR.R               | 854-862              | 0                |                            | 2      | 519.7644       | 0.7042                      | 31.650                       | 29                                 | 34                                 | 9.58x10 <sup>5</sup>                      | 6.92x10 <sup>5</sup>                      | 5.46x10 <sup>6</sup>                           |
| RPB1-14              | R.NSINQVVQLR.Y              | 881-890              | 0                |                            | 2      | 585.8331       | 1.9054                      | 56.422                       | *                                  | 59                                 | 1.09x10 <sup>6</sup>                      | 9.78x10 <sup>5</sup>                      | 1.95x10 <sup>8</sup>                           |
| RPB1-15a             | K.KLVINGDDPLSR.Q            | 1019-1031            | 1                | D (NQ)                     | 2      | 713.8987       | 0.7550                      | 60.745                       | 65                                 | 44                                 | 2.83x10 <sup>5</sup>                      | 2.21x10 <sup>5</sup>                      | 1.70x10 <sup>8</sup>                           |
| RPB1-15b             | K.KLVINGDDPLSR.Q            | 1019-1031            | 1                | D (NQ)                     | 3      | 476.2682       | 1.3753                      | 60.860                       |                                    | 21                                 | NP                                        | 3.00x10 <sup>5</sup>                      | 9.93x10 <sup>6</sup>                           |
| RPB1-16              | R.LKELINISK.K               | 1124-1132            | 1                |                            | 2      | 529.3344       | 1.8349                      | 53.301                       | *                                  | 29                                 | 8.41x10 <sup>5</sup>                      | 6.01x10 <sup>5</sup>                      | 7.17x10 <sup>7</sup>                           |
| RPB2-1a              | K.FEQIYLSKPTHWER.D          | 88-101               | 0                |                            | 2      | 917.4678       |                             | 58.509                       | *                                  |                                    | 3.22x10 <sup>5</sup>                      | NP                                        | 8.11x10 <sup>7</sup>                           |
| RPB2-1b              | K.FEQIYLSKPTHWER.D          | 88-101               | 0                |                            | 3      | 611.9809       | 3.9846                      | 58.881                       | 38                                 | 40                                 | 1.82x10 <sup>6</sup>                      | 2.79x10 <sup>5</sup>                      | 4.37x10 <sup>6</sup>                           |
| RPB2-2               | K.TVIKGEQEQLQTHQK.T         | 131-146              | 1                |                            | 3      | 632.6656       | 0.6749                      | 36.939                       | 19                                 | 24                                 | 7.21x10 <sup>5</sup>                      | 4.87x10 <sup>5</sup>                      | 1.56x10 <sup>8</sup>                           |
| RPB2-3a              | K.MATNTVYVFAK.K             | 200-210              | 0                |                            | 2      | 622.8208       | 4.5398                      | 61.180                       | 41                                 | 26                                 | 2.15x10 <sup>6</sup>                      | 2.16x10 <sup>6</sup>                      | 2.02x10 <sup>8</sup>                           |
| RPB2-3b              | K.MATNTVYVFAK.K             | 200-210              | 0                | O (M)                      | 2      | 630.8183       | 5.4382                      | 56.045                       | 46                                 | 53                                 | 1.66x10 <sup>6</sup>                      | 1.78x10 <sup>6</sup>                      | 5.67x10 <sup>7</sup>                           |
| RPB2-4a              | K.MATNTVYVFAK.D             | 200-211              | 1                |                            | 2      | 686.8683       | 2.3294                      | 53.740                       | 36                                 | 56                                 | 6.59x10 <sup>5</sup>                      | 3.25x10 <sup>5</sup>                      | 6.81x10 <sup>3</sup>                           |
| RPB2-4b              | K.MATNTVYVFAK.D             | 200-211              | 1                | O (M)                      | 2      | 694.8658       | 1.5449                      | 47.328                       | 29                                 | 56                                 | 4.33x10 <sup>5</sup>                      | 3.77x10 <sup>5</sup>                      | 6.72x10 <sup>4</sup>                           |
| RPB2-5               | K.TRIISDGLK.Y               | 437-445              | 1                |                            | 2      | 501.8008       | 1.3885                      | 38.977                       | 22                                 | 20                                 | 2.12x10 <sup>5</sup>                      | 3.04x10 <sup>5</sup>                      | 1.91x10 <sup>4</sup>                           |
| RPB2-6               | K.YSLATGNWGDQK.K            | 446-457              | 0                |                            | 2      | 670.3175       | 4.4807                      | 55.842                       | 66                                 | 64                                 | 2.65x10 <sup>6</sup>                      | 2.12x10 <sup>6</sup>                      | 1.04x10 <sup>7</sup>                           |
| RPB2-7a              | K.YSLATGNWGDQK.K            | 446-458              | 1                |                            | 2      | 734.3650       | 1.5864                      | 48.946                       | 63                                 | 43                                 | 1.09x10 <sup>6</sup>                      | 5.75x10 <sup>5</sup>                      | 8.77x10 <sup>7</sup>                           |
| RPB2-7b              | K.YSLATGNWGDQK.K            | 446-458              | 1                |                            | 3      | 489.9124       |                             | 48.946                       | *                                  | *                                  | 3.32x10 <sup>6</sup>                      | 2.02x10 <sup>6</sup>                      | 1.91x10 <sup>7</sup>                           |
| RPB2-8a              | K.QAMGVYITNFHVR.M           | 731-743              | 0                |                            | 3      | 512.5978       |                             |                              |                                    |                                    | NP                                        | NP                                        | 2.73x10 <sup>7</sup>                           |
| RPB2-8b              | K.QAMGVYITNFHVR.M           | 731-743              | 0                | O (M)                      | 2      | 776.3905       | 1.7298                      | 60.231                       | 34                                 | 24                                 | 3.85x10 <sup>5</sup>                      | 3.63x10 <sup>5</sup>                      | 4.00x10 <sup>7</sup>                           |
| RPB2-8c              | K.QAMGVYITNFHVR.M           | 731-743              | 0                | O (M)                      | 3      | 517.9294       | 4.4636                      | 60.147                       | 22                                 | 25                                 | 1.60x10 <sup>6</sup>                      | 1.98x10 <sup>6</sup>                      | 4.54x10 <sup>6</sup>                           |
| RPB2-9a              | H.VLYYPQKPLVTRR.S           | 750-762              | 0                |                            | 2      | 789.4562       | 4.3074                      | 55.156                       | 25                                 | 35                                 | 4.33x10 <sup>5</sup>                      | 2.57x10 <sup>6</sup>                      | 1.07x10 <sup>5</sup>                           |
| RPB2-9b              | H.VLYYPQKPLVTRR.S           | 750-762              | 0                |                            | 3      | 526.6399       |                             | 55.156                       | *                                  | *                                  | 4.38x10 <sup>6</sup>                      | 2.98x10 <sup>5</sup>                      | 8.90x10 <sup>4</sup>                           |
| RPB2-10a             | K.KGFDQEEVFEKPTR.E          | 821-834              | 1                |                            | 2      | 855.4283       |                             | 47.381                       | *                                  | *                                  | 3.49x10 <sup>4</sup>                      | 1.89x10 <sup>4</sup>                      | 1.32x10 <sup>8</sup>                           |
| RPB2-10b             | K.KGFDQEEVFEKPTR.E          | 821-834              | 1                |                            | 3      | 570.6213       | 2.5361                      | 46.786                       | 45                                 | 42                                 | 1.46x10 <sup>6</sup>                      | 1.06x10 <sup>6</sup>                      | 6.44x10 <sup>6</sup>                           |
| RPB2-11a             | K.TVTLPENEDELESTNR.R        | 870-885              | 0                |                            | 2      | 923.9369       | 2.3919                      | 53.773                       | 21                                 | 40                                 | 3.47x10 <sup>5</sup>                      | 2.33x10 <sup>5</sup>                      | 3.54x10 <sup>7</sup>                           |
| RPB2-11b             | K.TVTLPENEDELESTNR.R        | 870-885              | 0                |                            | 3      | 616.2937       |                             |                              |                                    |                                    | NP                                        | NP                                        | 1.39x10 <sup>7</sup>                           |
| RPB2-12a             | R.GNEVLYNGFTGR.K            | 1024-1035            | 0                |                            | 2      | 663.8255       | 4.2029                      | 59.237                       | 44                                 | 51                                 | 3.22x10 <sup>5</sup>                      | 2.41x10 <sup>5</sup>                      | 3.61x10 <sup>7</sup>                           |
| RPB2-12b             | R.GNEVLYNGFTGR.K            | 1024-1035            | 0                | D (NQ)                     | 2      | 664.3175       | 1.2727                      | 56.675                       | *                                  | 43                                 | 1.70x10 <sup>5</sup>                      | 8.42x10 <sup>5</sup>                      | 1.05x10 <sup>7</sup>                           |
| RPB2-13a             | R.GPIQILNRQPMGR.S           | 1065-1078            | 1                |                            | 3      | 536.9595       |                             | 58.315                       | *                                  | *                                  | 3.98x10 <sup>5</sup>                      | 1.87x10 <sup>5</sup>                      | NP                                             |
| RPB2-13b             | R.GPIQILNRQPMGR.S           | 1065-1078            | 1                | O (M)                      | 3      | 542.2911       | 4.3854                      | 52.060                       | 24                                 | 30                                 | 4.58x10 <sup>5</sup>                      | 6.52x10 <sup>5</sup>                      | 2.58x10 <sup>6</sup>                           |
| RPB2-14              | R.NKTQISLVR.M               | 1142-1150            | 1                |                            | 2      | 529.8195       | 0.6955                      | 39.019                       | 27                                 | *                                  | 9.21x10 <sup>5</sup>                      | 5.71x10 <sup>5</sup>                      | 2.52x10 <sup>5</sup>                           |
| RPB3-1a              | K.SEYSELDEDESQAPYDPNGKPER.F | 206-228              | 0                |                            | 2      | 1328.0701      |                             |                              |                                    |                                    | NP                                        | NP                                        | 6.36x10 <sup>7</sup>                           |
| RPB3-1b              | K.SEYSELDEDESQAPYDPNGKPER.F | 206-228              | 0                |                            | 3      | 885.7158       | 0.9992                      | 48.323                       | 78                                 | 74                                 | 5.84x10 <sup>5</sup>                      | 4.64x10 <sup>5</sup>                      | 2.19x10 <sup>5</sup>                           |
| RPB3-1c              | K.SEYSELDEDESQAPYDPNGKPER.F | 206-228              | 0                | D (NQ)                     | 4      | 664.7847       |                             |                              |                                    |                                    | NP                                        | NP                                        | 9.31x10 <sup>6</sup>                           |
| RPB5-1a              | R.ALIVVQQGMTPSAK.Q          | 102-115              | 0                |                            | 2      | 721.9054       | 3.6639                      | 58.713                       | 55                                 | 72                                 | 3.97x10 <sup>6</sup>                      | 3.11x10 <sup>6</sup>                      | 2.41x10 <sup>8</sup>                           |
| RPB5-1b              | R.ALIVVQQGMTPSAK.Q          | 102-115              | 0                | O (M)                      | 2      | 729.9029       | 1.7324                      | 49.651                       | 60                                 | 61                                 | 3.30x10 <sup>6</sup>                      | 3.50x10 <sup>6</sup>                      | 5.07x10 <sup>7</sup>                           |
| RPB5-2               | R.ALIVVQQGMTPSAKQSLVDMAPK.Y | 102-124              | 1                |                            | 3      | 815.4345       | 3.1331                      | 58.760                       | *                                  | 24                                 | 1.37x10 <sup>5</sup>                      | 1.73x10 <sup>5</sup>                      | NP                                             |
| RPB5-3a              | K.QSLVDMAPK.Y               | 116-124              | 0                |                            | 2      | 494.7603       | 2.7503                      | 51.855                       | *                                  | 53                                 | 3.37x10 <sup>6</sup>                      | 3.86x10 <sup>6</sup>                      | 1.16x10 <sup>8</sup>                           |
| RPB5-3b              | K.QSLVDMAPK.Y               | 116-124              | 0                | O (M)                      | 2      | 502.7577       | 1.1785                      | 37.239                       | 18                                 | 23                                 | 1.11x10 <sup>6</sup>                      | 1.80x10 <sup>6</sup>                      | 1.14x10 <sup>7</sup>                           |
| RPB8-1a              | R.ADQFEYVMYK.V              | 85-95                | 0                |                            | 2      | 675.8026       |                             |                              |                                    |                                    | NP                                        | NP                                        | 5.89x10 <sup>7</sup>                           |
| RPB8-1b              | R.ADQFEYVMYK.V              | 85-95                | 0                | O (M)                      | 2      | 683.8028       | 2.3618                      | 54.423                       | 49                                 | 44                                 | 6.76x10 <sup>5</sup>                      | 1.64x10 <sup>6</sup>                      | 4.94x10 <sup>6</sup>                           |
| RPB8-2               | K.VYRIEGDETSTEAATR.L        | 96-111               | 1                |                            | 3      | 599.9587       | 1.0242                      | 38.358                       | *                                  | 33                                 | 2.45x10 <sup>5</sup>                      | 3.09x10 <sup>5</sup>                      | 5.34x10 <sup>7</sup>                           |

<sup>1</sup> Pol II subunit and peptide number (e.g. RPB2-10 is subunit 2, peptide 10). Letters represent different charge and modification states of the same peptide.

<sup>2</sup> The modifications column indicates whether the peptide was determined to be oxidized (O) or methionine (M) or asparagine (N) or glutamine (Q).

<sup>3</sup> The average ppm M/Z error [(M/Z Obs - M/Z Calc) / M/Z Calc \* 1,000,000] for both crosslinked samples (ppm is 1/1000 Da).

<sup>4</sup> Asterisk indicates the peptide was manually identified by the XIC rather than by Mascot. Blank space indicates a peptide form was not identified (but was present in the non-crosslinked sample).

<sup>5</sup> NP, peptide form was not present.

**Supplementary Table 2. Pol II peptides crosslinked to B2 RNA(81-115)**

| <b>Subunit</b> | <b>Peptide</b>            | <b>Amino acid<br/>start-end</b> | <b>M/Z<br/>calculated</b> | <b>M/Z error<br/>ppm</b> | <b>Missed<br/>cleavages</b> | <b>Mascot<br/>score</b> |
|----------------|---------------------------|---------------------------------|---------------------------|--------------------------|-----------------------------|-------------------------|
| RPB1           | K.LLVDSNNPK.I             | 117-125                         | 500.2766                  | 1.10                     | 0                           | 26                      |
| RPB1           | N.TFHYAGVSAK.N            | 1106-1115                       | 540.7770                  | 0.55                     | 0                           | 34                      |
| RPB1           | G.GAMSPSYSPTSPAYEPR.S     | 1587-1603                       | 899.4090                  | 0.27                     | 0                           | 61                      |
| RPB1           | M.SPYSPTSPAYEPR.S         | 1590-1603                       | 769.8605                  | 1.00                     | 0                           | 69                      |
| RPB1           | K.YSPTSPTYSPTTPK.Y        | 1874-1887                       | 763.8730                  | 0.98                     | 0                           | 28                      |
| RPB1           | K.YSPTSPTYSPTSPVYTPTSPK.Y | 1888-1908                       | 1129.5530                 | 5.47                     | 0                           | 36                      |
| RPB1           | K.YSPTSPTYSPTSPK.Y        | 1909-1922                       | 756.8626                  | 2.46                     | 0                           | 44                      |
| RPB2           | K.GEIGDATPFNDAVNVQK.I     | 994-1010                        | 887.9346                  | 0.77                     | 0                           | 31                      |
| RPB3           | R.ITELTDENVK.F            | 11-20                           | 581.3052                  | 2.98                     | 0                           | 28                      |
| RPB8           | R.IEGDETSTEAATR.L         | 99-111                          | 690.3187                  | 1.14                     | 0                           | 50                      |

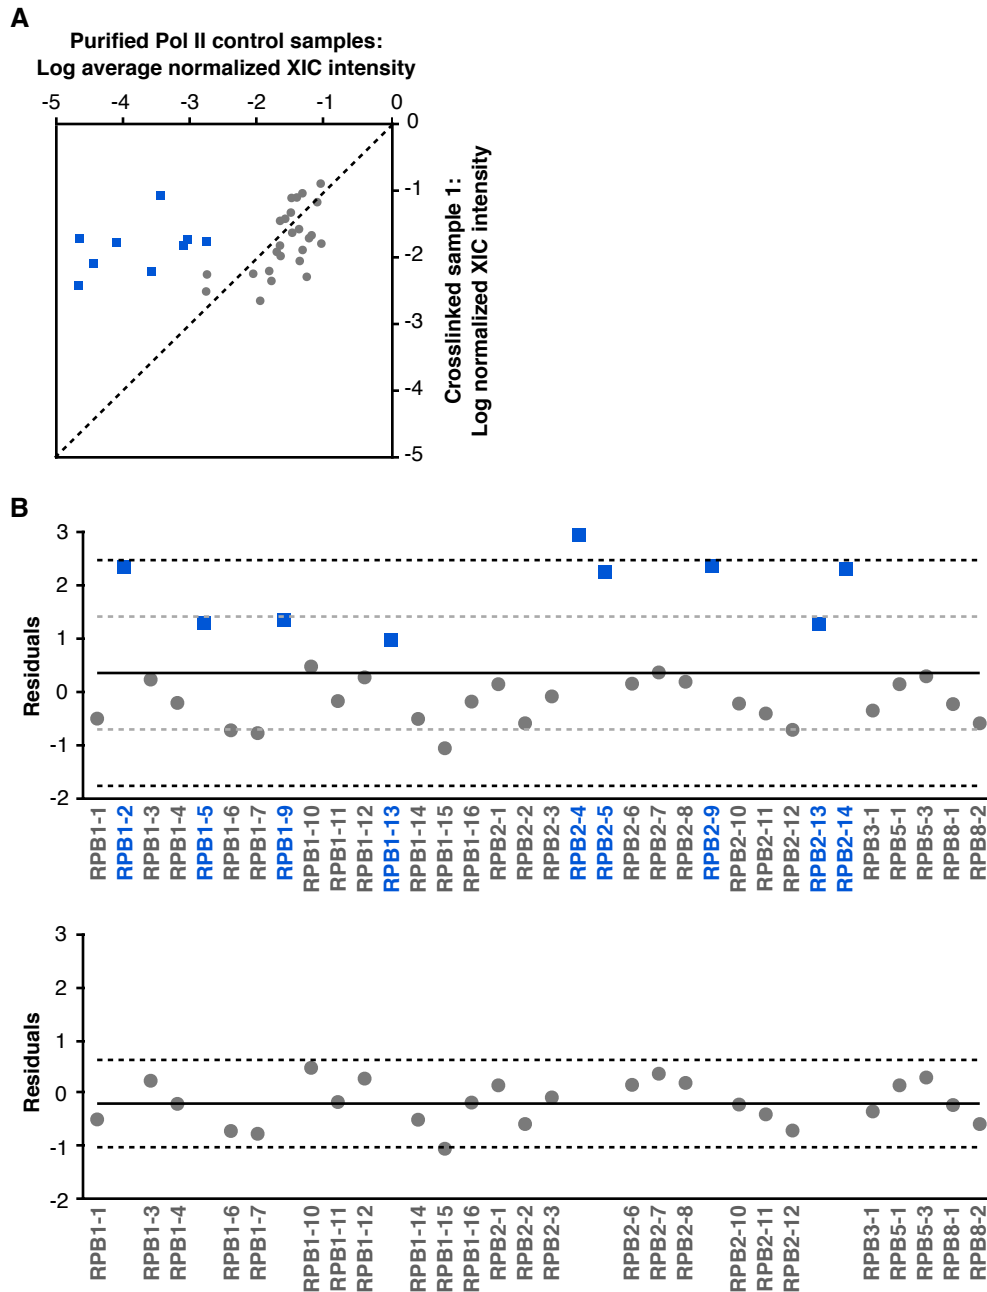

**Supplementary Figure 1.** Nine peptides in crosslinked sample 1 are significantly enriched compared to the control samples. The figure and the statistical approach are the same as Figure 5, with the exception that total XIC values for peptides from crosslinked sample 1 were used instead of the averages of XIC values from both crosslinked samples. See the legend of Figure 5 and the text for a more detailed description. **(A)** Comparison of the XIC values of peptides crosslinked to B2 RNA(81-130) in sample 1 to the average XIC values from the control samples. **(B)** Statistical analysis to determine which peptides were significantly enriched in crosslinked sample 1.

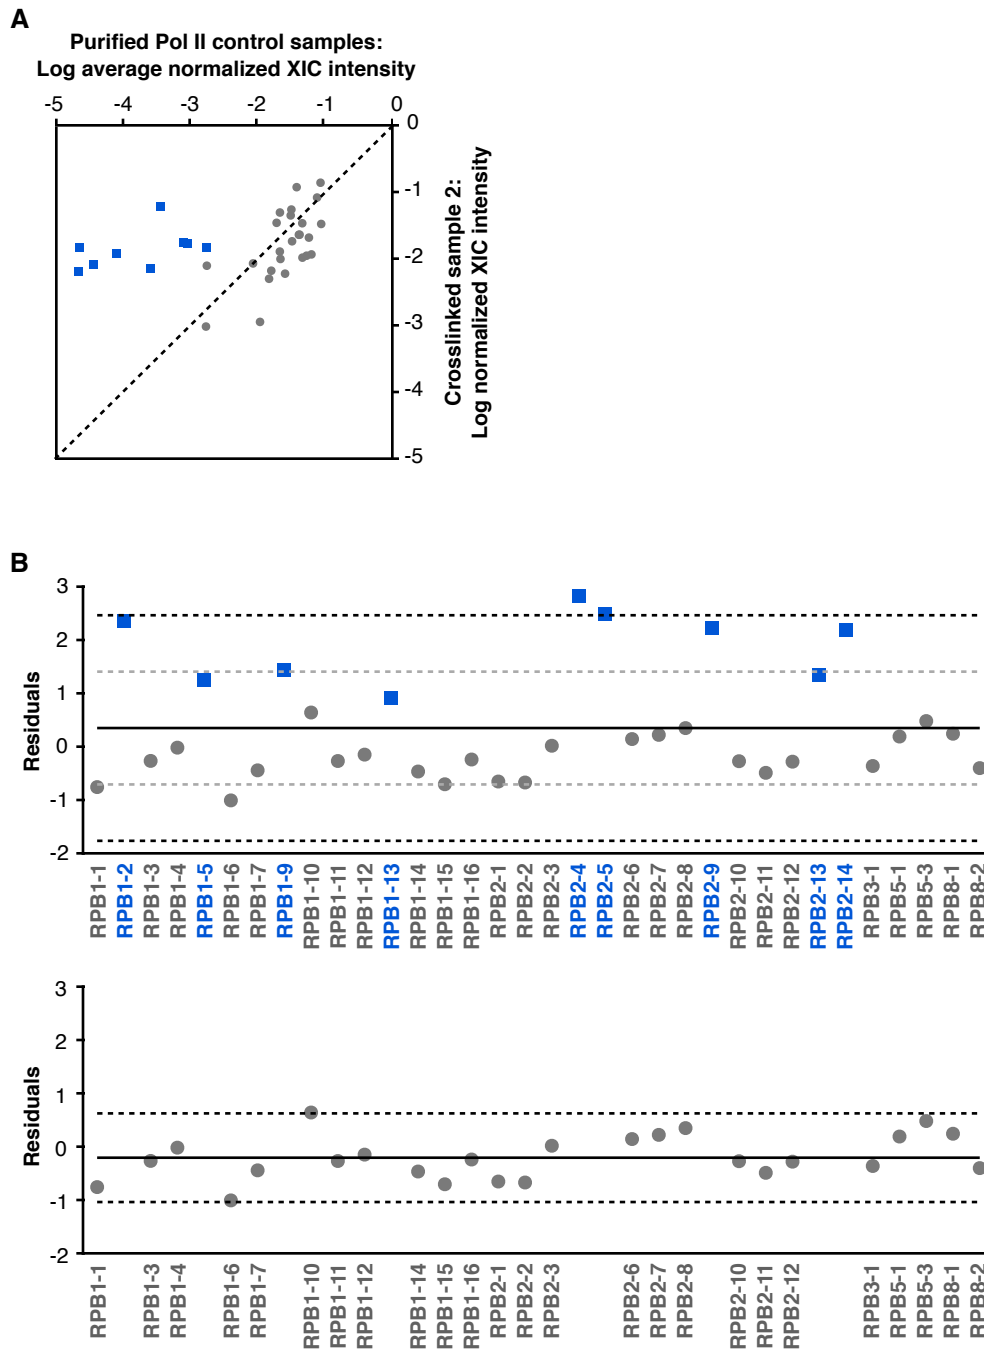

**Supplementary Figure 2.** Nine peptides in crosslinked sample 2 are significantly enriched compared to the control samples. The figure and the statistical approach are the same as Figure 5, with the exception that total XIC values for peptides from crosslinked sample 2 were used instead of the averages of XIC values from both crosslinked samples. See the legend of Figure 5 and the text for a more detailed description. **(A)** Comparison of the XIC values of peptides crosslinked to B2 RNA(81-130) in sample 2 to the average XIC values from the control samples. **(B)** Statistical analysis to determine which peptides were significantly enriched in crosslinked sample 2.

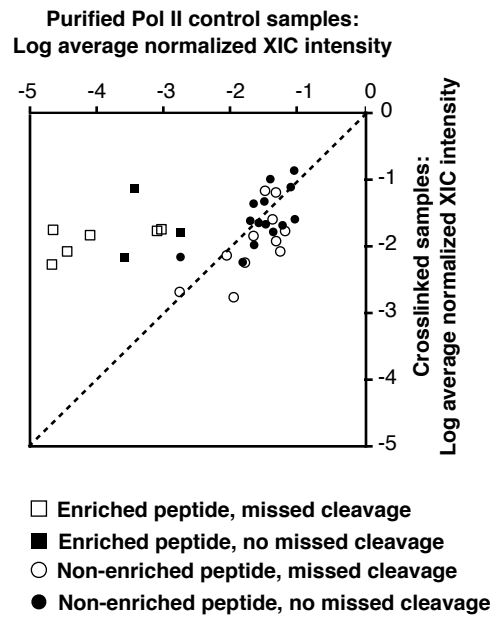

**Supplementary Figure 3.** Plot depicting trypsin missed cleavage in peptides crosslinked to B2 RNA(81-130). Trypsin missed cleavages are found in both crosslinked enriched and non-enriched peptides. The squares represent peptides statistically enriched in the crosslinked samples, whereas the circles represent peptides that were neither over- nor under-represented in the crosslinked samples.
